# Supplementary material
Source: publisher site journal article supplement (https://www.dovepress.com/article/126254)
Supplement: Supplementary file 1 [file get_supplementary_file.php]

| Feature ID     | Read.Count.All | Read.Count.S_aureus_29213_control | Read.Count.S_aureus_29213_Agent_S109 | FC          | LCF5(107930 vs control) | p.Value     | FDR        | Gene.Name | Description                                                   |
|----------------|----------------|-----------------------------------|--------------------------------------|-------------|-------------------------|-------------|------------|-----------|---------------------------------------------------------------|
| GSAN29213_1614 | 2127.722315    | 334.1952733                       | 3921.249356                          | 11.73340759 | 3.552250153             | 2.60E-14    | 6.78E-11   | NA        | putative protein vrxX                                         |
| GSAN29213_1615 | 787.6888863    | 150.454254                        | 1264.919347                          | 4.07400807  | 2.0265084               | 0.02244441  | 0.83461558 | A         | replication-associated protein A                              |
| GSAN29213_1630 | 1074.939048    | 155.2273127                       | 604.5327972                          | 1.95438161  | 1.894093155             | 0.00924858  | 0.00924858 | H         | minor outer protein H                                         |
| GSAN29213_1631 | 721.0386647    | 485.7701786                       | 1664.107917                          | 3.42510326  | 1.77603164              | 0.003008726 | 0.07103043 | grpE      | protein grpE                                                  |
| GSAN29213_1630 | 721.0386647    | 329.9341313                       | 1112.143198                          | 3.37803723  | 1.75302624              | 0.00927292  | 0.99608458 | F         | casid protein F                                               |
| GSAN29213_1480 | 692.0569825    | 368.8931432                       | 1055.220052                          | 2.75027899  | 1.46053886              | 0.030549605 | 0.99608458 | NA        | putative membrane protein                                     |
| GSAN29213_1000 | 598.9020919    | 159.2416941                       | 1034.416941                          | 1.512914804 | 1.35132324              | 0.00375617  | 0.99608458 | NA        | putative membrane protein                                     |
| GSAN29213_1630 | 1267.105951    | 1325.619951                       | 1808.670105                          | 1.429614668 | 1.317659784             | 0.018135987 | 0.99608458 | hrcA      | heat-inducible transcription repressor HrcA                   |
| GSAN29213_937  | 349.3806872    | 207.5784848                       | 491.182886                           | 2.366251444 | 1.242603387             | 0.05997934  | 0.99608458 | NA        | transcriptional activator RnII family protein                 |
| GSAN29213_1433 | 683.8264995    | 423.070519                        | 944.58248                            | 2.23683294  | 1.15877862              | 0.084475881 | 0.99608458 | NA        | ABC transporter family protein                                |
| GSAN29213_439  | 311.5640422    | 196.021282                        | 427.1155562                          | 2.179021719 | 1.123680576             | 0.13516129  | 0.99608458 | NA        | transcriptional regulator Y family protein                    |
| GSAN29213_2381 | 1031.3715113   | 352.427371                        | 2027.389025                          | 2.165366265 | 1.112781009             | 0.015366265 | 0.99608458 | NA        | conserved hypothetical protein                                |
| GSAN29213_242  | 1245.589054    | 752.579967                        | 1698.605712                          | 2.143155274 | 1.099736379             | 0.08798906  | 0.99608458 | NA        | bacterial regulatory vShZ tetr family protein                 |
| GSAN29213_1506 | 829.9979951    | 515.425706                        | 1128.57072                           | 2.12366777  | 1.086558087             | 0.088250051 | 0.99608458 | perR      | peroxide operon regulator                                     |
| GSAN29213_952  | 935.2953617    | 598.386021                        | 1268.204051                          | 2.119375284 | 1.068399072             | 0.078342956 | 0.99608458 | NA        | conserved hypothetical protein                                |
| GSAN29213_1480 | 446.447585     | 286.739876                        | 606.3755393                          | 2.114218608 | 1.080123395             | 0.135165164 | 0.99608458 | NA        | conserved hypothetical protein                                |
| GSAN29213_238  | 730.5656772    | 470.551846                        | 990.5795399                          | 2.105144448 | 1.073919229             | 0.103418513 | 0.99608458 | NA        | conserved hypothetical protein                                |
| GSAN29213_244  | 199.8402733    | 130.2691958                       | 269.4113508                          | 2.06811249  | 1.04831466              | 0.179302319 | 0.99608458 | NA        | fea domain protein                                            |
| GSAN29213_1269 | 205.7533751    | 132.0959994                       | 269.4113508                          | 2.039521072 | 1.028230414             | 0.187366794 | 0.99608458 | zapA      | cell division protein ZapA                                    |
| GSAN29213_247  | 201.4851361    | 174.7068186                       | 348.2643555                          | 1.999416492 | 0.995243169             | 0.19310301  | 0.99608458 | NA        | putative peptide export ATP-binding protein Yydl              |
| GSAN29213_1942 | 508.1759476    | 342.1088225                       | 670.2428727                          | 1.959151091 | 0.970278663             | 0.170399233 | 0.99608458 | NA        | phase Conserved Open Reading Frame S1 family protein          |
| GSAN29213_2240 | 534.0759999    | 363.4145321                       | 704.7406677                          | 1.939219831 | 0.955476358             | 0.173042274 | 0.99608458 | NA        | addition module toxinX2 TxeY/ToeB family                      |
| GSAN29213_737  | 677.0219711    | 462.029308                        | 892.0144115                          | 1.930643719 | 0.949081954             | 0.156076406 | 0.99608458 | NA        | nuclease-related domain protein                               |
| GSAN29213_2586 | 439.4818127    | 300.7349725                       | 578.2487229                          | 1.923913716 | 0.943294028             | 0.191804021 | 0.99608458 | NA        | metal-sensitive transcriptional repressor family protein      |
| GSAN29213_1211 | 351.1341329    | 271.1341329                       | 471.2614668                          | 1.8027602   | 0.853092628             | 0.22904262  | 0.99608458 | NA        | YH-type transcriptional regulator sarT                        |
| GSAN29213_370  | 359.300476     | 247.1462312                       | 471.4669639                          | 1.907655585 | 0.93180051              | 0.20668455  | 0.99608458 | NA        | YHt DNA-binding domain protein                                |
| GSAN29213_877  | 435.3749324    | 300.7349725                       | 570.0349923                          | 1.89559601  | 0.922654262             | 0.20234631  | 0.99608458 | mrpF      | nal <sup>r</sup> (YH-c) antipporter subunit F                 |
| GSAN29213_2238 | 790.4843738    | 546.0349                          | 1034.933848                          | 1.895362087 | 0.922473485             | 0.151449722 | 0.99608458 | NA        | YH-type protein                                               |
| GSAN29213_2534 | 232.7036278    | 163.140862                        | 302.266396                           | 1.852793988 | 0.889702407             | 0.24895554  | 0.99608458 | NA        | conserved hypothetical protein                                |
| GSAN29213_720  | 352.8029751    | 239.2328185                       | 478.6418211                          | 1.8343235   | 0.882912002             | 0.17382332  | 0.99608458 | NA        | putative crosslink endonuclease/RusA                          |
| GSAN29213_2504 | 455.082361     | 292.627269                        | 535.5173793                          | 1.817675365 | 0.862604588             | 0.232486135 | 0.99608458 | NA        | negative regulator of genetic competence family protein       |
| GSAN29213_827  | 1542.547524    | 1095.722027                       | 1988.37284                           | 1.815581383 | 0.8604316               | 0.090717055 | 0.99608458 | NA        | ahcX/75A family protein                                       |
| GSAN29213_1504 | 284.2168004    | 202.0999738                       | 366.333727                           | 1.812637089 | 0.85890011              | 0.254220357 | 0.99608458 | NA        | ahcX/75A family protein                                       |
| GSAN29213_1552 | 352.8029751    | 200.8402407                       | 503.0482227                          | 1.802761027 | 0.850916287             | 0.180737319 | 0.99608458 | NA        | YH-type transcriptional regulator sarT                        |
| GSAN29213_1785 | 302.7165128    | 126.1007687                       | 389.332227                           | 1.804236566 | 0.849297676             | 0.25628407  | 0.99608458 | scn       | staphylococcal complement inhibitor                           |
| GSAN29213_734  | 409.5453711    | 293.4100578                       | 525.6860485                          | 1.791624624 | 0.8412684               | 0.246217182 | 0.99608458 | NA        | bacterial regulatory vShZ luxR family protein                 |
| GSAN29213_1998 | 299.64365      | 214.882396                        | 384.4040005                          | 1.78886584  | 0.839069888             | 0.262347726 | 0.99608458 | NA        | conserved hypothetical protein                                |
| GSAN29213_1480 | 691.6941364    | 497.9448698                       | 885.444303                           | 1.778195053 | 0.830414071             | 0.210620782 | 0.99608458 | NA        | conserved hypothetical family protein                         |
| GSAN29213_1748 | 152.7921745    | 104.6541028                       | 218.641028                           | 1.754029188 | 0.829028002             | 0.283983703 | 0.99608458 | NA        | conserved hypothetical protein                                |
| GSAN29213_794  | 287.777482     | 207.5784848                       | 367.9764791                          | 1.772710112 | 0.825956634             | 0.271433955 | 0.99608458 | NA        | conserved hypothetical protein                                |
| GSAN29213_905  | 245.4537077    | 177.1417569                       | 313.7656586                          | 1.771268752 | 0.824781326             | 0.278885593 | 0.99608458 | NA        | putative membrane protein                                     |
| GSAN29213_420  | 1534.864928    | 1111.549306                       | 1958.16055                           | 1.761649744 | 0.816917211             | 0.108593071 | 0.99608458 | NA        | helic-tumor-like domainX2C rpfII family protein               |
| GSAN29213_1424 | 255.6085151    | 255.6085151                       | 355.6085151                          | 1.765376924 | 0.816917211             | 0.307921477 | 0.99608458 | chp       | chemotaxis inhibition protein                                 |
| GSAN29213_799  | 392.9635802    | 284.8877379                       | 501.0940244                          | 1.758252534 | 0.814530354             | 0.263585411 | 0.99608458 | mscL      | large conductance mechanosensitive channel protein            |
| GSAN29213_124  | 12675.49292    | 1121.58826                        | 16138.30701                          | 1.751776544 | 0.808818757             | 0.004644342 | 0.92994093 | lip       | lipase                                                        |
| GSAN29213_539  | 942.0177206    | 684.826796                        | 1199.209062                          | 1.751114001 | 0.808273009             | 0.18435585  | 0.99608458 | NA        | lactose-specific phosphotransferase enzyme LI component       |
| GSAN29213_1854 | 871.2751852    | 633.692676                        | 1188.857904                          | 1.748851209 | 0.80721888              | 0.19513512  | 0.99608458 | secG      | prepeptide translocaseX2C SecG subunit                        |
| GSAN29213_2506 | 365.8494704    | 265.8494704                       | 437.3817931                          | 1.742131245 | 0.802912002             | 0.255829054 | 0.99608458 | NA        | conserved hypothetical protein                                |
| GSAN29213_1400 | 234.1962742    | 151.054113                        | 297.3318172                          | 1.738266409 | 0.797649028             | 0.296638902 | 0.99608458 | NA        | conserved hypothetical protein                                |
| GSAN29213_1745 | 718.2283138    | 524.7291904                       | 911.7274372                          | 1.737519951 | 0.797029544             | 0.224845417 | 0.99608458 | NA        | cysteine-rich secretary family protein                        |
| GSAN29213_1434 | 285.4050796    | 209.404885                        | 361.4054706                          | 1.725870959 | 0.7873246               | 0.294262009 | 0.99608458 | NA        | ABC-2 transporter family protein                              |
| GSAN29213_2051 | 1065.800897    | 1224.165109                       | 1848.478313                          | 1.721704714 | 0.78383773              | 0.110012344 | 0.99608458 | NA        | ABC-binding protein HU                                        |
| GSAN29213_1494 | 631.8664729    | 431.8664729                       | 1085.891844                          | 1.718494647 | 0.781145375             | 0.116280462 | 0.99608458 | reck      | regulatory protein Reck                                       |
| GSAN29213_2573 | 1190.399044    | 801.5305136                       | 1401.267755                          | 1.714042799 | 0.779649028             | 0.296638902 | 0.99608458 | NA        | conserved hypothetical protein                                |
| GSAN29213_2549 | 278.8004283    | 278.8004283                       | 476.3981203                          | 1.708742426 | 0.772394943             | 0.28997934  | 0.99608458 | NA        | putative replication protein                                  |
| GSAN29213_1674 | 551.0637876    | 407.2432044                       | 694.8841528                          | 1.706311557 | 0.770881094             | 0.266206709 | 0.99608458 | NA        | shikimate kinase family protein                               |
| GSAN29213_2308 | 465.4929789    | 271.8889879                       | 619.9705899                          | 1.698021727 | 0.765916287             | 0.297184126 | 0.99608458 | NA        | conserved hypothetical protein                                |
| GSAN29213_725  | 711.323748     | 528.990323                        | 893.6571636                          | 1.68993886  | 0.756480116             | 0.249778874 | 0.99608458 | NA        | phase head morphogenesis S2C SPP3 opf7 domain protein         |
| GSAN29213_981  | 559.7361772    | 416.374388                        | 703.0979155                          | 1.688619305 | 0.755844113             | 0.274064099 | 0.99608458 | NA        | thioredoxin family protein                                    |
| GSAN29213_349  | 314.0079291    | 234.7507029                       | 394.2605134                          | 1.686646619 | 0.754157736             | 0.310318338 | 0.99608458 | NA        | conserved hypothetical protein                                |
| GSAN29213_262  | 651.6717304    | 486.9674677                       | 848.478313                           | 1.676526739 | 0.749837983             | 0.266114667 | 0.99608458 | NA        | putative ofF073                                               |
| GSAN29213_2475 | 548.0059184    | 360.0993658                       | 680.0993658                          | 1.679345793 | 0.744172548             | 0.479381629 | 0.99608458 | NA        | CAX protease self-immunity family protein                     |
| GSAN29213_2157 | 468.54681      | 350.631064                        | 586.4251636                          | 1.67259123  | 0.742084904             | 0.296320437 | 0.99608458 | NA        | putative membrane protein                                     |
| GSAN29213_1846 | 366.4335666    | 274.5932864                       | 485.3278468                          | 1.669443571 | 0.73936733              | 0.31238941  | 0.99608458 | NA        | conserved hypothetical protein                                |
| GSAN29213_1768 | 332.294363     | 248.972439                        | 415.6162912                          | 1.669126531 | 0.739261683             | 0.317132511 | 0.99608458 | NA        | colicin V production family protein                           |
| GSAN29213_1584 | 285.4050796    | 168.0107385                       | 379.1678636                          | 1.623204565 | 0.732918017             | 0.328106216 | 0.99608458 | NA        | staphylococcal tandem five-TM family protein                  |
| GSAN29213_955  | 877.4876024    | 605.295281                        | 1095.715677                          | 1.662039955 | 0.732950055             | 0.237506161 | 0.99608458 | cspD      | coli shock protein CspD                                       |
| GSAN29213_2139 | 505.3359393    | 379.8503652                       | 630.8168214                          | 1.660698209 | 0.731789923             | 0.297461208 | 0.99608458 | glcT      | glcA/glcB gene antiterminal                                   |
| GSAN29213_229  | 273.722363     | 205.752812                        | 341.6924449                          | 1.660698209 | 0.731789923             | 0.30586052  | 0.99608458 | NA        | glycosyl-4N2C <sup>+</sup> -disponoreporepore acyltransferase |
| GSAN29213_1241 | 467.2084251    | 351.2394049                       | 583.1770994                          | 1.660384349 | 0.731477347             | 0.302386088 | 0.99608458 | NA        | ABC transporter family protein                                |
| GSAN29213_1424 | 350.3020516    | 654.3806516                       | 1026.801516                          | 1.65829112  | 0.728410407             | 0.456193212 | 0.99608458 | NA        | bacterial Ig-like domain protein                              |
| GSAN29213_759  | 292.8013232    | 192.8013232                       | 484.611881                           | 1.656087743 | 0.726907702             | 0.276833662 | 0.99608458 | NA        | acetyltransferase family protein                              |
| GSAN29213_1151 | 678.1601821    | 511.945747                        | 804.7435995                          | 1.649343852 | 0.7218922               | 0.276833662 | 0.99608458 | NA        | ABC-2 type transporter family protein                         |
| GSAN29213_344  | 861.614554     | 551.9547134                       | 1071.074395                          | 1.646286249 | 0.716215011             | 0.250654431 | 0.99608458 | NA        | mer/R regulatory family protein                               |
| GSAN29213_1489 | 986.1490866    | 696.1490866                       | 1452.7530959                         | 1.645429269 | 0.715570509             | 0.187115284 | 0.99608458 | NA        | ribosomal protein L16                                         |
| GSAN29213_1509 | 645.5428149    | 483.425286                        | 801.6634039                          | 1.637977214 | 0.711915288             | 0.288639948 | 0.99608458 |           |                                                               |

|               |              |              |              |             |              |             |             |             |                                                                                      |
|---------------|--------------|--------------|--------------|-------------|--------------|-------------|-------------|-------------|--------------------------------------------------------------------------------------|
| GS429213_828  | 1505.368704  | 1200.424552  | 1810.312857  | 1.508600506 | 0.592694314  | 0.245032756 | 0.999608458 | <b>spA</b>  | regulatory protein spA                                                               |
| GS429213_128  | 666.3315157  | 564.327497   | 800.0202917  | 1.501982909 | 0.586889397  | 0.375996822 | 0.999608458 | <b>icaR</b> | biofilm operon icaA/BC/IC/TH-type negative transcriptional regulator icaR            |
| GS429213_1505 | 1059.501574  | 1269.820295  | 849.3028559  | 0.668837049 | 0.580273351  | 0.238840129 | 0.999608458 | <b>U</b>    | U-dimer specific 2-hydroxyacyl dehydrogenase/2Ca catalytic domain protein            |
| GS429213_1617 | 826.7029928  | 825.4449269  | 851.9647187  | 0.668808217 | 0.580284259  | 0.237272256 | 0.999608458 | <b>broE</b> | shikimate dehydrogenase                                                              |
| GS429213_181  | 2240.632483  | 2683.738877  | 1795.520808  | 0.668542069 | 0.580909749  | 0.1666627   | 0.999608458 | <b>NA</b>   | putative regulatory protein                                                          |
| GS429213_1068 | 1694.434614  | 2031.95596   | 1356.913267  | 0.66778675  | 0.582540627  | 0.233505416 | 0.999608458 | <b>tyrS</b> | tyrosine-tRNA ligase                                                                 |
| GS429213_133  | 1199.207874  | 1439.044849  | 959.3072492  | 0.666667767 | 0.584890112  | 0.302710598 | 0.999608458 | <b>NA</b>   | peptide methionine sulfidoxyl reductase family protein                               |
| GS429213_1922 | 936.9816803  | 1761.219963  | 1438.239916  | 0.667734195 | 0.585894502  | 0.155894464 | 0.999608458 | <b>NA</b>   | ketonore recombination family protein                                                |
| GS429213_859  | 576.3552369  | 679.939289   | 495.9790989  | 0.663987421 | 0.590772184  | 0.402776782 | 0.999608458 | <b>lepB</b> | signal peptidase 1                                                                   |
| GS429213_1940 | 539.650505   | 648.910406   | 400.410604   | 0.663266663 | 0.59233908   | 0.407519137 | 0.999608458 | <b>NA</b>   | yywF-like family protein                                                             |
| GS429213_1813 | 768.4028047  | 924.059616   | 612.7465479  | 0.661301229 | 0.592904614  | 0.368058288 | 0.999608458 | <b>NA</b>   | conserved hypothetical protein                                                       |
| GS429213_1308 | 1711.933654  | 2054.740281  | 1365.137028  | 0.664395511 | 0.592726638  | 0.233062677 | 0.999608458 | <b>NA</b>   | cation diffusion facilitator transporter family protein                              |
| GS429213_1007 | 956.961803   | 1126.158935  | 745.8094711  | 0.662295916 | 0.594514127  | 0.232789098 | 0.999608458 | <b>NA</b>   | membrane ABC-dispensation domain protein                                             |
| GS429213_1080 | 6724.857707  | 8094.34344   | 5355.317973  | 0.661619069 | 0.595927276  | 0.382656983 | 0.999608458 | <b>NA</b>   | ftsK/SpoIIIE family protein                                                          |
| GS429213_1733 | 868.702312   | 1045.805973  | 691.5986505  | 0.661306847 | 0.596608257  | 0.374090021 | 0.999608458 | <b>NA</b>   | conserved hypothetical protein                                                       |
| GS429213_1143 | 1158.473417  | 1443.309641  | 954.4389928  | 0.661284984 | 0.596655953  | 0.29301451  | 0.999608458 | <b>NA</b>   | conserved hypothetical protein                                                       |
| GS429213_1215 | 328.1331597  | 395.087292   | 261.1979501  | 0.661144684 | 0.596920201  | 0.35132636  | 0.999608458 | <b>NA</b>   | conserved hypothetical protein                                                       |
| GS429213_1693 | 2550.024098  | 3072.850257  | 2027.15614   | 0.659689993 | 0.600139874  | 0.123211687 | 0.999608458 | <b>lpdA</b> | dihydrolipoyl dehydrogenase                                                          |
| GS429213_2369 | 448.5167516  | 540.556289   | 356.4772142  | 0.659463633 | 0.600634993  | 0.415230122 | 0.999608458 | <b>NA</b>   | initiation-contraction protein yabA                                                  |
| GS429213_573  | 519.3593244  | 626.387619   | 412.3307669  | 0.658267524 | 0.603254072  | 0.401955797 | 0.999608458 | <b>NA</b>   | degV domain-containing protein SA1258                                                |
| GS429213_593  | 364.7781828  | 729.872737   | 479.5862246  | 0.657215453 | 0.605561743  | 0.389974081 | 0.999608458 | <b>NA</b>   | terminase small subunit                                                              |
| GS429213_954  | 420.3657688  | 518.643488   | 340.9496208  | 0.655654179 | 0.608993021  | 0.411496609 | 0.999608458 | <b>NA</b>   | single-stranded DNA-binding protein sbp                                              |
| GS429213_1052 | 887.8441048  | 1072.590294  | 703.0979155  | 0.655513964 | 0.609301581  | 0.333634703 | 0.999608458 | <b>NA</b>   | N-6 DNA Methylase family protein                                                     |
| GS429213_39   | 3939.824369  | 4763.347929  | 3116.300088  | 0.654224897 | 0.612141432  | 0.054024528 | 0.999608458 | <b>NA</b>   | ycyf family protein                                                                  |
| GS429213_1197 | 3047.385565  | 3686.496493  | 2408.274636  | 0.653269206 | 0.61425046   | 0.0821482   | 0.999608458 | <b>pdpA</b> | penicillin binding protein 4                                                         |
| GS429213_1144 | 495.5099136  | 605.5099136  | 323.4221741  | 0.653125161 | 0.615232714  | 0.410537343 | 0.999608458 | <b>NA</b>   | putative transcription factor                                                        |
| GS429213_308  | 1871.789111  | 2265.101296  | 1478.4276325 | 0.652720003 | 0.615438363  | 0.185306646 | 0.999608458 | <b>NA</b>   | CAIX protease self-immunity family protein                                           |
| GS429213_1667 | 551.2511971  | 667.137074   | 435.2931919  | 0.652488327 | 0.615953892  | 0.386594468 | 0.999608458 | <b>NA</b>   | metallo-beta-lactamase superfamily protein                                           |
| GS429213_927  | 1306.570365  | 1581.492386  | 1031.648343  | 0.652352836 | 0.616335325  | 0.260791501 | 0.999608458 | <b>NA</b>   | phage major capsid protein2c/IK97 family                                             |
| GS429213_1649 | 853.3754624  | 1033.022548  | 673.528377   | 0.65199775  | 0.617061129  | 0.333101174 | 0.999608458 | <b>NA</b>   | putative phosphotransferase vofL                                                     |
| GS429213_2048 | 1079.4056085 | 1295.191935  | 720.1875065  | 0.651898289 | 0.617609178  | 0.37456078  | 0.999608458 | <b>NA</b>   | 3S ribosomal protein S1                                                              |
| GS429213_1011 | 3096.288659  | 3749.804888  | 2442.774231  | 0.651439876 | 0.618226002  | 0.077780482 | 0.999608458 | <b>pyrG</b> | CTP synthase                                                                         |
| GS429213_687  | 864.9915427  | 1048.249912  | 681.742137   | 0.650367802 | 0.62067226   | 0.328167363 | 0.999608458 | <b>NA</b>   | bacterial regulatory t2c2 gntR family protein                                        |
| GS429213_689  | 1071.402708  | 1298.439816  | 843.747595   | 0.650303882 | 0.62081406   | 0.29355101  | 0.999608458 | <b>NA</b>   | peptidase M16 inactive domain protein                                                |
| GS429213_1620 | 550.729356   | 650.729356   | 320.1857651  | 0.649387657 | 0.622058575  | 0.402412381 | 0.999608458 | <b>NA</b>   | DEAD-box ATP-dependent RNA helicase CshB                                             |
| GS429213_1894 | 1258.034173  | 1525.488807  | 990.5795399  | 0.649352128 | 0.622926866  | 0.262877743 | 0.999608458 | <b>NA</b>   | thf family protein                                                                   |
| GS429213_2027 | 1081.079925  | 1311.214242  | 850.945608   | 0.648975264 | 0.623764605  | 0.289662818 | 0.999608458 | <b>higA</b> | gamma-hemolysin component A                                                          |
| GS429213_527  | 729.514604   | 885.7087843  | 573.3204965  | 0.647301355 | 0.62749057   | 0.346814564 | 0.999608458 | <b>NA</b>   | peptidase M23 family protein                                                         |
| GS429213_1459 | 382.5440552  | 464.464469   | 300.623614   | 0.647247877 | 0.627609707  | 0.403951598 | 0.999608458 | <b>NA</b>   | putative hypothetical protein                                                        |
| GS429213_1164 | 481.4211138  | 583.4211138  | 2140.837149  | 0.646398977 | 0.628584514  | 0.28494381  | 0.999608458 | <b>cnbB</b> | DEAD-box ATP-dependent RNA helicase CshB                                             |
| GS429213_715  | 748.777349   | 909.4494321  | 588.1052658  | 0.646660765 | 0.628919014  | 0.342266855 | 0.999608458 | <b>NA</b>   | conserved hypothetical protein                                                       |
| GS429213_1866 | 1648.917061  | 2004.345436  | 1294.488686  | 0.646163494 | 0.63002885   | 0.20862243  | 0.999608458 | <b>NA</b>   | sporulation Regulator WHA C terminal domain protein                                  |
| GS429213_1604 | 1988.341     | 2416.067467  | 1560.614363  | 0.645931896 | 0.630546502  | 0.160614997 | 0.999608458 | <b>NA</b>   | ftsX-like permease family protein                                                    |
| GS429213_56   | 926.9582214  | 1129.3811343 | 645.6457533  | 0.645758533 | 0.631064049  | 0.308644089 | 0.999608458 | <b>NA</b>   | putative orf13                                                                       |
| GS429213_871  | 802.1834169  | 959.1927466  | 629.1740063  | 0.645179181 | 0.632228209  | 0.330111407 | 0.999608458 | <b>NA</b>   | lysine-associated B family protein                                                   |
| GS429213_1500 | 1019.489286  | 1240.610333  | 798.3775396  | 0.643540928 | 0.635896191  | 0.290136519 | 0.999608458 | <b>NA</b>   | conserved hypothetical protein                                                       |
| GS429213_642  | 1202.347429  | 1463.397881  | 941.2699757  | 0.643226964 | 0.636602011  | 0.260743803 | 0.999608458 | <b>rnc</b>  | ribonuclease III                                                                     |
| GS429213_177  | 4959.219196  | 6036.820268  | 3881.823305  | 0.643024467 | 0.637054485  | 0.033766995 | 0.999608458 | <b>rfdD</b> | aneroBil ribonucleoside triphosphate reductase                                       |
| GS429213_1176 | 467.4195914  | 547.4195914  | 285.1975183  | 0.642919645 | 0.637819687  | 0.398023133 | 0.999608458 | <b>NA</b>   | ribD/327 protein                                                                     |
| GS429213_1780 | 398.9465425  | 485.7701786  | 312.1229064  | 0.642512045 | 0.638159687  | 0.393369858 | 0.999608458 | <b>NA</b>   | fibronogen-binding protein                                                           |
| GS429213_795  | 1035.891773  | 1261.900742  | 809.8768046  | 0.641788159 | 0.639830923  | 0.284411992 | 0.999608458 | <b>lplI</b> | lipase-protein lipase LplI                                                           |
| GS429213_1063 | 2986.774719  | 3640.841401  | 2332.708037  | 0.640705755 | 0.642266147  | 0.071861723 | 0.999608458 | <b>serA</b> | phosphoglycerate dehydrogenase                                                       |
| GS429213_1396 | 1009.292498  | 1267.994888  | 811.153567   | 0.640480354 | 0.642180034  | 0.28072995  | 0.999608458 | <b>NA</b>   | MDC3 domain protein                                                                  |
| GS429213_833  | 860.0790905  | 1026.326548  | 620.1535468  | 0.637044027 | 0.640534509  | 0.309251321 | 0.999608458 | <b>NA</b>   | oligoneuridin/depeside/ABC transporter/2Ca ATP-binding 2Ca C-terminal domain protein |
| GS429213_631  | 637.6456912  | 794.1182364  | 496.1112436  | 0.637090999 | 0.641259714  | 0.344489011 | 0.999608458 | <b>rpe</b>  | ribulose-phosphate 3-epimerase                                                       |
| GS429213_2165 | 2637.915551  | 3225.684432  | 2050.15467   | 0.63571989  | 0.638752552  | 0.086584872 | 0.999608458 | <b>pepF</b> | oligoendopeptidase F                                                                 |
| GS429213_1877 | 621.6392969  | 760.309465   | 482.8691289  | 0.635227037 | 0.636455775  | 0.344689706 | 0.999608458 | <b>urk</b>  | uridine kinase                                                                       |
| GS429213_1529 | 1074.805768  | 1301.071739  | 739.1551251  | 0.634838467 | 0.636654603  | 0.346656463 | 0.999608458 | <b>atpA</b> | ATP synthase F1F2 alpha subunit                                                      |
| GS429213_1784 | 816.517869   | 998.9334124  | 634.1023257  | 0.634797373 | 0.635672845  | 0.309517546 | 0.999608458 | <b>fib</b>  | fibronogen-binding protein                                                           |
| GS429213_1100 | 780.944399   | 955.7132587  | 606.1755393  | 0.634265073 | 0.636482196  | 0.314994829 | 0.999608458 | <b>NA</b>   | methyltransferase domain protein                                                     |
| GS429213_165  | 1847.785753  | 2246.448899  | 1344.122617  | 0.634160968 | 0.63707901   | 0.159788857 | 0.999608458 | <b>NA</b>   | putative oligopeptidase family protein                                               |
| GS429213_1948 | 916.7804943  | 1163.9067498 | 737.5097104  | 0.633727474 | 0.638065532  | 0.28420224  | 0.999608458 | <b>NA</b>   | prolyl 4-hydroxylase 2                                                               |
| GS429213_477  | 1071.852057  | 1317.852057  | 1121.99971   | 0.633261429 | 0.638681372  | 0.257029127 | 0.999608458 | <b>NA</b>   | acetyltransferase family protein                                                     |
| GS429213_1713 | 532.1427501  | 651.9547134  | 412.3307669  | 0.632453111 | 0.639699569  | 0.355028765 | 0.999608458 | <b>nudF</b> | ADP-ribose pyrophosphatase                                                           |
| GS429213_328  | 2419.854841  | 2966.972244  | 1872.737439  | 0.631194795 | 0.63842785   | 0.097774509 | 0.999608458 | <b>NA</b>   | vodA lipocalin-like domain protein                                                   |
| GS429213_1291 | 1242.136302  | 1523.662093  | 961.010013   | 0.63072926  | 0.64492012   | 0.33802311  | 0.999608458 | <b>NA</b>   | PHF domain protein                                                                   |
| GS429213_304  | 415.221138   | 502.234556   | 302.444873   | 0.630216011 | 0.645181473  | 0.252173782 | 0.999608458 | <b>NA</b>   | putative like family protein                                                         |
| GS429213_809  | 1331.924575  | 1633.843558  | 1000.005591  | 0.629187376 | 0.645391876  | 0.220326138 | 0.999608458 | <b>NA</b>   | major Facilitator Superfamily protein                                                |
| GS429213_267  | 1096.48174   | 1345.303377  | 847.6601038  | 0.630088438 | 0.646373757  | 0.25492862  | 0.999608458 | <b>NA</b>   | ABC-2 transporter family protein                                                     |
| GS429213_1573 | 1044.293141  | 1281.994983  | 806.5913003  | 0.629168843 | 0.646880805  | 0.261651218 | 0.999608458 | <b>NA</b>   | NAD(P)-dependent FMN reductase family protein                                        |
| GS429213_1257 | 976.6540024  | 1201.642021  | 755.666294   | 0.628861151 | 0.6469186582 | 0.17376144  | 0.999608458 | <b>pyrH</b> | pyruvate reductase                                                                   |
| GS429213_2142 | 420.804921   | 508.819387   | 307.8865249  | 0.628519645 | 0.647084825  | 0.399608458 | 0.999608458 | <b>NA</b>   | peptide methionine sulfidoxyl reductase MsrA 1                                       |
| GS429213_308  | 2780.521954  | 3415.969614  | 2145.432924  | 0.628126131 | 0.647087375  | 0.07105480  | 0.999608458 | <b>bioA</b> | adenylnucleoside-5'-sulfonate-2'-oxonucleoside transferase                           |
| GS429213_1736 | 494.119722   | 594.119722   | 28           |             |              |             |             |             |                                                                                      |

|               |              |              |             |             |               |             |             |              |                                                                                              |
|---------------|--------------|--------------|-------------|-------------|---------------|-------------|-------------|--------------|----------------------------------------------------------------------------------------------|
| GS429213_2207 | 418.517742   | 526.555941   | 310.4801543 | 0.588643858 | -0.762084257  | 0.302566574 | 0.999608458 | <b>quef</b>  | 7-cyano-7-deazaquinine reductase                                                             |
| GS429213_2158 | 1509.287384  | 1899.866561  | 1118.714207 | 0.588840165 | -0.764052013  | 0.137017006 | 0.999608458 | <b>re</b>    | putative NAD(P)H-dependent FMN-containing oxidoreductase ywqN                                |
| GS429213_1608 | 858.4288279  | 1081.112578  | 635.7430778 | 0.588047064 | -0.763998469  | 0.22654892  | 0.999608458 | <b>na</b>    | type IV secretion system family protein                                                      |
| GS429213_2078 | 714.3103599  | 874.3103599  | 455.0423245 | 0.587824527 | -0.763761148  | 0.078765824 | 0.999608458 | <b>re</b>    | recombination protein                                                                        |
| GS429213_2347 | 608.5598156  | 677.005542   | 450.1140861 | 0.58845935  | -0.768946294  | 0.067380488 | 0.999608458 | <b>na</b>    | S1 RNA binding domain protein                                                                |
| GS429213_1352 | 2961.061819  | 3733.977789  | 2188.145849 | 0.586093337 | -0.771004443  | 0.031231803 | 0.999608458 | <b>na</b>    | bacterial extracellular solute-binding family protein                                        |
| GS429213_1248 | 1020.748413  | 1287.473594  | 754.023218  | 0.58661124  | -0.773801363  | 0.197322814 | 0.999608458 | <b>na</b>    | conserved hypothetical protein                                                               |
| GS429213_1838 | 2344.236789  | 3011.026239  | 1371.088626 | 0.581362289 | -0.773219269  | 0.060509291 | 0.999608458 | <b>na</b>    | binding-dependent transport system inner membrane component family protein                   |
| GS429213_2593 | 2289.206077  | 2880.69255   | 1249.62319  | 0.58441004  | -0.774964464  | 0.060695928 | 0.999608458 | <b>na</b>    | conserved hypothetical protein                                                               |
| GS429213_2277 | 670.9134505  | 847.358507   | 494.4683939 | 0.583540957 | -0.777004178  | 0.251692717 | 0.999608458 | <b>na</b>    | NUDIX domain protein                                                                         |
| GS429213_42   | 827.024774   | 1044.588504  | 609.4610436 | 0.583446057 | -0.77732882   | 0.22485772  | 0.999608458 | <b>na</b>    | putative membrane protein                                                                    |
| GS429213_2498 | 423.9040595  | 535.086425   | 312.1229504 | 0.582639741 | -0.779274464  | 0.29062751  | 0.999608458 | <b>na</b>    | conserved hypothetical protein                                                               |
| GS429213_136  | 150.3842924  | 170.3842924  | 93.8359321  | 0.581701708 | -0.781641124  | 0.083958274 | 0.999608458 | <b>na</b>    | conserved hypothetical protein                                                               |
| GS429213_1127 | 849.3311553  | 1074.416498  | 624.2458128 | 0.581009147 | -0.783367218  | 0.217502347 | 0.999608458 | <b>hxlA</b>  | 3-hexulose-6-phosphate synthase                                                              |
| GS429213_810  | 961.1048935  | 1217.469119  | 704.7406677 | 0.5785712   | -0.788720806  | 0.195558971 | 0.999608458 | <b>na</b>    | conserved hypothetical protein                                                               |
| GS429213_702  | 1320.496157  | 1673.411305  | 967.5810209 | 0.578208721 | -0.790337726  | 0.145569641 | 0.999608458 | <b>miab</b>  | RNA-16(A37) histonase enzyme Miab                                                            |
| GS429213_1915 | 765.200838   | 970.322881   | 560.784794  | 0.577311415 | -0.792573878  | 0.263176975 | 0.999608458 | <b>na</b>    | helix-helix-turn-helix family protein                                                        |
| GS429213_2473 | 711.4885227  | 902.1446174  | 520.7524281 | 0.577238303 | -0.792761061  | 0.232506355 | 0.999608458 | <b>na</b>    | nitroreductase family protein                                                                |
| GS429213_986  | 2602.86299   | 3301.776252  | 1903.949729 | 0.57664408  | -0.794246971  | 0.038541955 | 0.999608458 | <b>secDF</b> | protein translocase subunit SecDF                                                            |
| GS429213_1064 | 199.168062   | 199.168062   | 112.642463  | 0.576472848 | -0.794675436  | 0.118842046 | 0.999608458 | <b>na</b>    | HAD-hydrolase-like family protein                                                            |
| GS429213_1492 | 1539.01612   | 1522.445134  | 875.5686801 | 0.575118847 | -0.798067978  | 0.157474295 | 0.999608458 | <b>yhbO</b>  | protein yhbO                                                                                 |
| GS429213_1137 | 1247.000695  | 1583.927324  | 910.084685  | 0.574747774 | -0.799433499  | 0.150523767 | 0.999608458 | <b>mgf</b>   | uracil DNA glycosylase                                                                       |
| GS429213_1400 | 2506.520258  | 3187.942889  | 1825.097626 | 0.572500101 | -0.804652147  | 0.040212693 | 0.999608458 | <b>na</b>    | phage Terminase family protein                                                               |
| GS429213_1753 | 913.9988126  | 1163.688009  | 665.3146163 | 0.572223565 | -0.805349184  | 0.194367707 | 0.999608458 | <b>na</b>    | conserved hypothetical protein                                                               |
| GS429213_461  | 555.087125   | 703.697151   | 402.4742741 | 0.571942462 | -0.8060058102 | 0.236315798 | 0.999608458 | <b>mgbB</b>  | molybdopterin-guanine dinucleotide biosynthesis protein B                                    |
| GS429213_593  | 495.2804929  | 614.2079881  | 311.1264964 | 0.569145492 | -0.811264964  | 0.256155492 | 0.999608458 | <b>na</b>    | transcription factor family protein                                                          |
| GS429213_1241 | 546.421682   | 690.0107008  | 395.0302318 | 0.568555051 | -0.816312905  | 0.248751334 | 0.999608458 | <b>rcuA</b>  | HTH-type transcriptional regulator rcuA                                                      |
| GS429213_635  | 2726.144305  | 3477.70539   | 1974.588071 | 0.56778538  | -0.816581993  | 0.028989042 | 0.999608458 | <b>na</b>    | DAK2 domain fusion YbV family protein                                                        |
| GS429213_2349 | 260.9471501  | 332.979041   | 188.916496  | 0.567354621 | -0.81767733   | 0.292691885 | 0.999608458 | <b>na</b>    | S4 domain protein                                                                            |
| GS429213_1627 | 431.5138415  | 550.9047765  | 312.1229504 | 0.566408158 | -0.819688712  | 0.246463842 | 0.999608458 | <b>pstI</b>  | ribosomal protein S20                                                                        |
| GS429213_2230 | 930.239239   | 1273.927198  | 542.821278  | 0.56621632  | -0.82031932   | 0.232104212 | 0.999608458 | <b>na</b>    | nickel ABC transporter-like Ni <sup>2+</sup> nickel/metallophore periplasmic binding protein |
| GS429213_1757 | 667.9031235  | 867.931181   | 482.969128  | 0.565307578 | -0.82032924   | 0.232627954 | 0.999608458 | <b>idcC</b>  | heme uptake protein IdcC                                                                     |
| GS429213_170  | 972.4582086  | 1241.818502  | 703.0979155 | 0.56461842  | -0.820656809  | 0.17708485  | 0.999608458 | <b>na</b>    | histidine kinase-%2C DNA gyrase B-%2C and HSP90-like ATPase family protein                   |
| GS429213_411  | 1000.059749  | 1279.95131   | 717.168189  | 0.563874624 | -0.822653676  | 0.16992829  | 0.999608458 | <b>na</b>    | helix-turn-helix domain%2C rpiR family protein                                               |
| GS429213_991  | 565.280938   | 723.1765659  | 402.4025305 | 0.563501809 | -0.82309192   | 0.23875959  | 0.999608458 | <b>hcrA</b>  | holliday junction DNA-helicase RuvA                                                          |
| GS429213_1881 | 442.712895   | 566.731875   | 318.639315  | 0.562316316 | -0.830494874  | 0.256568232 | 0.999608458 | <b>na</b>    | conserved hypothetical protein                                                               |
| GS429213_1873 | 216.8222062  | 277.582992   | 156.0614532 | 0.56221554  | -0.830804764  | 0.293875603 | 0.999608458 | <b>na</b>    | rnC Barrel sandwich hybrid domain protein                                                    |
| GS429213_1325 | 306.728356   | 388.590367   | 218.840365  | 0.561863495 | -0.831708426  | 0.0185437   | 0.999608458 | <b>brnQ</b>  | branched-chain amino acid transport system II carrier protein                                |
| GS429213_2152 | 427.8322441  | 548.4098383  | 307.193405  | 0.560309372 | -0.832629195  | 0.25474031  | 0.999608458 | <b>na</b>    | N-(5'-phosphoribosyl)anthranilate (PRA) isomerase family protein                             |
| GS429213_2265 | 1271.4716399 | 1723.644284  | 723.644284  | 0.558605729 | -0.833886262  | 0.165514928 | 0.999608458 | <b>na</b>    | conserved hypothetical protein                                                               |
| GS429213_1720 | 1117.312099  | 1432.961513  | 801.6630439 | 0.558445064 | -0.837931626  | 0.147976305 | 0.999608458 | <b>sraA</b>  | transcriptional regulatory protein sraA                                                      |
| GS429213_323  | 2348.620274  | 3165.062274  | 1682.178189 | 0.557924858 | -0.841857264  | 0.038691079 | 0.999608458 | <b>femA</b>  | aminoacyltransferase femA                                                                    |
| GS429213_1004 | 1699.796366  | 2182.313396  | 1217.279335 | 0.557793901 | -0.84219803   | 0.03807468  | 0.999608458 | <b>folC</b>  | bifunctional FolC family protein                                                             |
| GS429213_2302 | 2049.805613  | 2634.031074  | 1455.343494 | 0.55618029  | -0.842669522  | 0.05609522  | 0.999608458 | <b>na</b>    | multifunctional transfer domain protein                                                      |
| GS429213_2134 | 824.651698   | 1095.198134  | 588.1058134 | 0.555236312 | -0.848482612  | 0.18492876  | 0.999608458 | <b>na</b>    | conserved hypothetical protein                                                               |
| GS429213_1485 | 218.6484099  | 281.235366   | 156.0614532 | 0.554914039 | -0.849663792  | 0.282349875 | 0.999608458 | <b>na</b>    | conserved hypothetical protein                                                               |
| GS429213_1390 | 2196.344768  | 2828.789499  | 1563.900036 | 0.55285133  | -0.850536525  | 0.034319273 | 0.999608458 | <b>na</b>    | zinc-binding dehydrogenase family protein                                                    |
| GS429213_975  | 976.2648775  | 1257.456     | 694.8841548 | 0.552572799 | -0.858581044  | 0.158410565 | 0.999608458 | <b>suFC</b>  | fes assembly ATPase SuFC                                                                     |
| GS429213_790  | 900.800838   | 1184.474126  | 518.274126  | 0.552164949 | -0.861061527  | 0.236224064 | 0.999608458 | <b>na</b>    | bacteriocin export ABC transporter-%2C lactococcin 972 group family protein                  |
| GS429213_1236 | 348.650839   | 449.246105   | 248.055773  | 0.551259652 | -0.856842625  | 0.254508993 | 0.999608458 | <b>na</b>    | conserved hypothetical protein                                                               |
| GS429213_1616 | 1574.93899   | 2029.51022   | 1120.356959 | 0.550203201 | -0.857180819  | 0.088642687 | 0.999608458 | <b>yeqH</b>  | ribosome biogenesis GTPase YeqH                                                              |
| GS429213_118  | 1420.747786  | 1832.899759  | 1008.649613 | 0.550207629 | -0.861720566  | 0.10187701  | 0.999608458 | <b>na</b>    | imidazoleglycerol-phosphate dehydratase family protein                                       |
| GS429213_1739 | 395.8194557  | 510.7287956  | 280.5106158 | 0.549288864 | -0.862444884  | 0.165317794 | 0.999608458 | <b>na</b>    | conserved hypothetical protein                                                               |
| GS429213_252  | 319.8602713  | 3020.540895  | 1659.179661 | 0.548028989 | -0.864318081  | 0.014142921 | 0.999608458 | <b>na</b>    | bacterial histone-like turn-helix-%2C yhrA family protein                                    |
| GS429213_1803 | 2006.68819   | 2590.774286  | 1422.62352  | 0.548111268 | -0.864829579  | 0.0523337   | 0.999608458 | <b>bshC</b>  | bacillithiol biosynthesis cysteine-adding enzyme BshC                                        |
| GS429213_1406 | 257.3572785  | 332.369096   | 182.3454874 | 0.548623296 | -0.866111633  | 0.265013479 | 0.999608458 | <b>na</b>    | phage head-tail joining family protein                                                       |
| GS429213_1421 | 1428.508848  | 1845.07445   | 1001.955813 | 0.548242926 | -0.866651955  | 0.099158233 | 0.999608458 | <b>prmc</b>  | protein-(glutamine-N5) methyltransferase-%2C release factor-specific factor                  |
| GS429213_154  | 1796.309261  | 2321.322345  | 1271.490156 | 0.547502904 | -0.868267984  | 0.165514928 | 0.999608458 | <b>na</b>    | conserved hypothetical protein                                                               |
| GS429213_131  | 929.371432   | 1201.64021   | 657.1008556 | 0.546835783 | -0.870820443  | 0.157812779 | 0.999608458 | <b>yweE</b>  | tyrosine-protein phosphatase YweE                                                            |
| GS429213_1125 | 718.5740418  | 929.537676   | 507.610411  | 0.546089121 | -0.872701678  | 0.189343712 | 0.999608458 | <b>na</b>    | conserved hypothetical protein                                                               |
| GS429213_2413 | 695.7906517  | 900.318437   | 491.1828896 | 0.545655749 | -0.874175022  | 0.192281604 | 0.999608458 | <b>na</b>    | putative membrane protein                                                                    |
| GS429213_1772 | 345.879697   | 395.677468   | 209.2405302 | 0.545078664 | -0.87664265   | 0.24982925  | 0.999608458 | <b>na</b>    | putative autolytic transcriptional regulator                                                 |
| GS429213_1949 | 317.1550571  | 410.089678   | 223.4424678 | 0.543774895 | -0.87951309   | 0.24777008  | 0.999608458 | <b>na</b>    | conserved hypothetical protein                                                               |
| GS429213_1499 | 1729.319992  | 2241.366649  | 1127.279335 | 0.543098379 | -0.880714538  | 0.067521866 | 0.999608458 | <b>mutY</b>  | A/G-specific adenine glycosylase                                                             |
| GS429213_384  | 484.1318792  | 628.2140656  | 340.0496928 | 0.541259892 | -0.885510657  | 0.219550623 | 0.999608458 | <b>na</b>    | conserved hypothetical protein                                                               |
| GS429213_2608 | 655.795124   | 851.616946   | 459.970589  | 0.540112713 | -0.888667809  | 0.19124003  | 0.999608458 | <b>na</b>    | CDP-Glycerol-3-epimerase family protein                                                      |
| GS429213_1804 | 794.3980604  | 1044.3980604 | 545.2384883 | 0.539720518 | -0.890948614  | 0.197632028 | 0.999608458 | <b>na</b>    | cyclic lactone-ATPase synthase family protein                                                |
| GS429213_868  | 636.2280481  | 827.070666   | 445.3852097 | 0.538138318 | -0.893951058  | 0.191606646 | 0.999608458 | <b>na</b>    | S1 RNA binding domain protein                                                                |
| GS429213_971  | 2467.586181  | 3208.63864   | 1726.532048 | 0.538088589 | -0.894084381  | 0.02739923  | 0.999608458 | <b>suFB</b>  | fes assembly protein SuFB                                                                    |
| GS429213_107  | 853.3254316  | 1106.331837  | 596.310265  | 0.537063792 | -0.89683635   | 0.15651354  | 0.999608458 | <b>na</b>    | conserved hypothetical protein                                                               |
| GS429213_1929 | 514.159373   | 2008.824047  | 1074.339809 | 0.53480201  | -0.902873842  | 0.075578031 | 0.999608458 | <b>atpB</b>  | ATP synthase F0Nc2-A subunit                                                                 |
| GS429213_2502 | 690.490028   | 791.144085   | 478.921495  | 0.534651632 | -0.901381662  | 0.202115528 | 0.999608458 | <b>na</b>    | transposase IS66 family protein                                                              |
| GS429213_2101 | 667.9900513  | 891.091549   | 464.988554  | 0.533692236 | -0.905920073  | 0.180695251 | 0.999608458 | <b>dsps</b>  | DNA replication during starvation protein 1                                                  |
| GS429213_675  | 522.110975   | 681.179723   | 363.482227  | 0.53297191  | -0.90786212   | 0.202206436 | 0.999608458 | <b>rimP</b>  | ribosome maturation factor rimP                                                              |
| GS429213_275  | 1198.02842   | 1563.266287  | 832.872345  | 0.53291715  | -0.908357909  | 0.10717443  | 0.999608458 | <b>na</b>    | penicillinase repressor factor rimP                                                          |
| GS429213_1528 | 619.23111    | 852.631345   | 462.753145  | 0.53252373  | -0.91036918   | 0.165163307 | 0.999608458 | <b>na</b>    | conserved hypothetical protein                                                               |
| GS429213_1804 | 515.6901946  | 673.260423   | 358.1199663 | 0.531918934 | -0.910721704  | 0.201734108 | 0.999608458 | <b>na</b>    | mzA family protein                                                                           |
| GS429213_1624 | 532.3970492  | 695.1748671  | 369.619213  | 0.531692454 | -0.911361603  | 0.198897902 | 0.999608458 | <b>na</b>    | comE operon protein 2                                                                        |
| GS429213_15   | 1027.302699  | 1506.009391  | 712.9544428 | 0.531400822 | -0.912127635  | 0.12590643  | 0.999608458 | <b>na</b>    | conserved hypothetical protein                                                               |
| GS429213_2407 | 1153.014796  | 1506.009391  |             |             |               |             |             |              |                                                                                              |

|                      |             |             |             |              |              |              |             |              |                                                                            |
|----------------------|-------------|-------------|-------------|--------------|--------------|--------------|-------------|--------------|----------------------------------------------------------------------------|
| <b>GSA29213_1615</b> | 364.0568104 | 499.7710735 | 228.3425473 | 0.456894285  | -1.130067698 | 0.130061033  | 0.999608458 | <b>NA</b>    | HAD hydrolase%2C IA%2C variant 1 family protein                            |
| <b>GSA29213_1518</b> | 603.4647311 | 829.0964703 | 377.832992  | 0.455716561  | -1.133791296 | 0.100556747  | 0.999608458 | <b>NA</b>    | conserved hypothetical protein                                             |
| <b>GSA29213_1255</b> | 2456.099285 | 3377.868072 | 1534.330498 | 0.454230439  | -1.138503707 | 0.004081601  | 0.985367223 | <b>NA</b>    | UDP-N-acetylglucosamine 2-epimerase                                        |
| <b>GSA29213_2218</b> | 607.8985145 | 826.401285  | 379.1972441 | 0.453700375  | -1.140187666 | 0.09811542   | 0.999608458 | <b>NA</b>    | conserved hypothetical protein                                             |
| <b>GSA29213_743</b>  | 1063.017864 | 1464.006616 | 662.029112  | 0.452203634  | -1.144955509 | 0.051476019  | 0.999608458 | <b>NA</b>    | cof-1ike hydrolase family protein                                          |
| <b>GSA29213_314</b>  | 1674.091777 | 2308.32145  | 1039.862104 | 0.450484097  | -1.150451918 | 0.018557382  | 0.999608458 | <b>HlgC</b>  | gamma-hemolysin component C                                                |
| <b>GSA29213_920</b>  | 434.2030788 | 598.9948067 | 269.4113508 | 0.449772432  | -1.152732859 | 0.114460242  | 0.999608458 | <b>NA</b>    | putative gp49                                                              |
| <b>GSA29213_1025</b> | 1570.42325  | 2167.890323 | 974.1520185 | 0.449519751  | -1.153145459 | 0.021895502  | 0.999608458 | <b>dnaI</b>  | primosomal protein DnaI                                                    |
| <b>GSA29213_900</b>  | 1849.715952 | 2556.076416 | 1143.355489 | 0.447308806  | -1.160656936 | 0.012607876  | 0.999608458 | <b>NA</b>    | 5'-nucleotidase%2C C-terminal domain protein                               |
| <b>GSA29213_1975</b> | 654.2273752 | 907.623285  | 400.8315219 | 0.441627659  | -1.179097563 | 0.082068161  | 0.999608458 | <b>NA</b>    | spT-like family protein                                                    |
| <b>GSA29213_2267</b> | 1201.638459 | 1667.323959 | 735.9529583 | 0.441397699  | -1.179848987 | 0.035866322  | 0.999608458 | <b>NA</b>    | PAP2 superfamily protein                                                   |
| <b>GSA29213_2339</b> | 716.3391795 | 994.063359  | 438.6348211 | 0.441234192  | -1.180383503 | 0.075142923  | 0.999608458 | <b>foiR</b>  | 2-amino-4-hydroxy-6-hydroxymethylidihydropteridine diphosphokinase         |
| <b>GSA29213_1410</b> | 395.8693959 | 540.6878074 | 241.8485644 | 0.439311608  | -1.186680191 | 0.108318626  | 0.999608458 | <b>NA</b>    | putative 7206234                                                           |
| <b>GSA29213_1354</b> | 1605.350585 | 2231.620896 | 979.0802749 | 0.438730555  | -1.18852909  | 0.01705822   | 0.999608458 | <b>NA</b>    | binding-dependent transport system inner membrane component family protein |
| <b>GSA29213_1973</b> | 1218.103482 | 1695.325749 | 740.8812147 | 0.437014075  | -1.194248348 | 0.032752662  | 0.999608458 | <b>sigB</b>  | RNA polymerase sigma-8 factor                                              |
| <b>GSA29213_928</b>  | 798.0805935 | 1111.549306 | 484.611881  | 0.435978754  | -1.197670264 | 0.062898863  | 0.999608458 | <b>NA</b>    | conserved hypothetical protein                                             |
| <b>GSA29213_1800</b> | 381.5266611 | 531.4252706 | 231.6280516 | 0.435861944  | -1.19805685  | 0.106463465  | 0.999608458 | <b>NA</b>    | conserved hypothetical protein                                             |
| <b>GSA29213_1876</b> | 453.1030401 | 631.8664729 | 274.3396072 | 0.434173388  | -1.203656795 | 0.097187547  | 0.999608458 | <b>greA</b>  | transcription elongation factor greA                                       |
| <b>GSA29213_624</b>  | 542.90811   | 757.2657922 | 328.5504278 | 0.433864082  | -1.204684939 | 0.087304878  | 0.999608458 | <b>defA</b>  | peptide deformylase                                                        |
| <b>GSA29213_2510</b> | 315.6415347 | 440.7238212 | 190.5592481 | 0.432377918  | -1.209635251 | 0.110272947  | 0.999608458 | <b>NA</b>    | N-6 DNA Methylase family protein                                           |
| <b>GSA29213_2259</b> | 1150.15032  | 1607.059238 | 693.2414027 | 0.43137265   | -1.212993884 | 0.033792792  | 0.999608458 | <b>NA</b>    | bacterial regulatory %2C gtrR family protein                               |
| <b>GSA29213_1409</b> | 264.4244176 | 369.5019777 | 159.3469795 | 0.431248032  | -1.213410223 | 0.115518066  | 0.999608458 | <b>NA</b>    | bacterial Ig-like domain family protein                                    |
| <b>GSA29213_493</b>  | 373.9800149 | 522.902867  | 225.0570431 | 0.43039923   | -1.216252597 | 0.102010623  | 0.999608458 | <b>rlpX</b>  | ribosomal protein L24                                                      |
| <b>GSA29213_1840</b> | 1334.113328 | 1868.200364 | 800.0202917 | 0.42822908   | -1.223545327 | 0.023377712  | 0.999608458 | <b>nuc</b>   | thermonuclease                                                             |
| <b>GSA29213_1544</b> | 390.870321  | 548.4698383 | 233.2708037 | 0.425312     | -1.233406535 | 0.095517865  | 0.999608458 | <b>pprR</b>  | ribosomal protein S18                                                      |
| <b>GSA29213_1683</b> | 622.489764  | 875.3602968 | 369.6192133 | 0.42224811   | -1.243837128 | 0.06956222   | 0.999608458 | <b>eIF</b>   | translation elongation factor P                                            |
| <b>GSA29213_514</b>  | 882.502934  | 1244.22344  | 520.7524281 | 0.41852601   | -1.256610809 | 0.044301875  | 0.999608458 | <b>rlpM</b>  | ribosomal protein L13                                                      |
| <b>GSA29213_714</b>  | 263.2684843 | 373.7630196 | 152.7759489 | 0.408750842  | -1.290706393 | 0.094164045  | 0.999608458 | <b>hfg</b>   | RNA chaperone Hfg                                                          |
| <b>GSA29213_442</b>  | 727.509291  | 1033.631282 | 422.1872997 | 0.408450583  | -1.291766553 | 0.050451303  | 0.999608458 | <b>NA</b>    | uref family protein                                                        |
| <b>GSA29213_1709</b> | 1237.564047 | 1758.025408 | 717.8826848 | 0.408346024  | -1.292139316 | 0.020105633  | 0.999608458 | <b>proC</b>  | pyrroline 5-carboxylate reductase                                          |
| <b>GSA29213_1027</b> | 809.4300645 | 1152.336521 | 466.5416075 | 0.408086468  | -1.304481925 | 0.0419510064 | 0.999608458 | <b>ncfR</b>  | transcriptional regulator NcfR                                             |
| <b>GSA29213_391</b>  | 1136.220273 | 1618.62194  | 653.8153513 | 0.403932519  | -1.3078138   | 0.022717324  | 0.999608458 | <b>NA</b>    | ABC transporter family protein                                             |
| <b>GSA29213_1965</b> | 603.9900516 | 861.3594019 | 346.6207013 | 0.402411236  | -1.313257508 | 0.056958822  | 0.999608458 | <b>NA</b>    | bacterial PH domain protein                                                |
| <b>GSA29213_1486</b> | 660.0770452 | 942.3210984 | 377.832992  | 0.40095992   | -1.318470064 | 0.05129943   | 0.999608458 | <b>vfrA</b>  | low molecular weight protein-tyrosine-phosphatase vfrA                     |
| <b>GSA29213_923</b>  | 261.1223649 | 373.1542851 | 140.4004447 | 0.400612965  | -1.319738982 | 0.087219128  | 0.999608458 | <b>NA</b>    | conserved hypothetical protein                                             |
| <b>GSA29213_2541</b> | 842.8851194 | 1207.728366 | 478.0489725 | 0.395817876  | -1.337091326 | 0.034832     | 0.999608458 | <b>hrcC</b>  | protein hrcC                                                               |
| <b>GSA29213_1621</b> | 330.4054257 | 478.4653639 | 182.3454874 | 0.381104885  | -1.391739995 | 0.064809252  | 0.999608458 | <b>NA</b>    | BH1328 protein                                                             |
| <b>GSA29213_1777</b> | 659.7768337 | 958.1481969 | 361.4054706 | 0.37719162   | -1.406630471 | 0.037636212  | 0.999608458 | <b>rdgB</b>  | non-canonical purine NTP pyrophosphatase%2C RdgB/HAM1 family               |
| <b>GSA29213_462</b>  | 667.2025642 | 969.7141535 | 364.6097949 | 0.376089093  | -1.410850044 | 0.036571203  | 0.999608458 | <b>moHfE</b> | molybdopterin synthase catalytic subunit                                   |
| <b>GSA29213_514</b>  | 698.5482382 | 1015.971798 | 381.1184963 | 0.375121476  | -1.414517603 | 0.034051632  | 0.999608458 | <b>pyrE</b>  | orotate phosphoribosyltransferase                                          |
| <b>GSA29213_2276</b> | 465.9531575 | 680.5652377 | 251.3410733 | 0.369312247  | -1.437086989 | 0.04672415   | 0.999608458 | <b>NA</b>    | conserved hypothetical protein                                             |
| <b>GSA29213_335</b>  | 343.4932187 | 504.64095   | 182.3454874 | 0.36133708   | -1.468582784 | 0.050458806  | 0.999608458 | <b>nirD</b>  | nitrite reductase [NAD(P)H%2C small subunit                                |
| <b>GSA29213_1160</b> | 2192.245902 | 3221.423239 | 1163.068514 | 0.361041816  | -1.469762155 | 0.000529397  | 0.459339873 | <b>NA</b>    | HD domain protein                                                          |
| <b>GSA29213_2446</b> | 732.5748377 | 1077.460171 | 387.6895048 | 0.3558017945 | -1.474669954 | 0.025351652  | 0.999608458 | <b>lecD</b>  | 3-isopropylmalate dehydratase%2C small subunit                             |
| <b>GSA29213_9</b>    | 1520.356913 | 2245.621791 | 795.0920353 | 0.354063189  | -1.497921195 | 0.003391029  | 0.882684797 | <b>NA</b>    | glycosyl transferases group 1 family protein                               |
| <b>GSA29213_1141</b> | 649.6201095 | 973.9752955 | 325.2649235 | 0.333566031  | -1.582269928 | 0.019918781  | 0.999608458 | <b>NA</b>    | conserved hypothetical protein                                             |
| <b>GSA29213_2231</b> | 1647.640816 | 2490.333084 | 804.9485481 | 0.323229271  | -1.629370242 | 0.000963717  | 0.583709995 | <b>NA</b>    | binding-dependent transport system inner membrane component family protein |
| <b>GSA29213_1771</b> | 444.6265697 | 675.0953612 | 213.5577781 | 0.316056303  | -1.661746507 | 0.022569551  | 0.999608458 | <b>trxA</b>  | thioredoxin                                                                |
| <b>GSA29213_1411</b> | 359.5630346 | 546.6436346 | 172.4899746 | 0.315541906  | -1.664096476 | 0.026135835  | 0.999608458 | <b>acpP</b>  | acyl carrier protein                                                       |
| <b>GSA29213_1826</b> | 641.8649776 | 983.1063139 | 300.6236414 | 0.305789554  | -1.70938997  | 0.012241105  | 0.999608458 | <b>NA</b>    | thioredoxin family protein                                                 |
| <b>GSA29213_2340</b> | 266.4131946 | 414.5482351 | 118.278154  | 0.285318195  | -1.809356345 | 0.019281914  | 0.999608458 | <b>folB</b>  | dihydropteridin aldolase                                                   |
| <b>GSA29213_1943</b> | 203.9344882 | 320.8031129 | 87.0686337  | 0.271399684  | -1.881590956 | 0.018050784  | 0.999608458 | <b>NA</b>    | hypothetical protein                                                       |
| <b>GSA29213_1724</b> | 378.4704218 | 595.9511339 | 160.9891996 | 0.270139111  | -1.888225564 | 0.011377448  | 0.999608458 | <b>NA</b>    | conserved hypothetical protein                                             |
| <b>GSA29213_677</b>  | 201.5012757 | 317.7904401 | 85.42311123 | 0.268294899  | -1.895236637 | 0.017396062  | 0.999608458 | <b>NA</b>    | conserved hypothetical protein                                             |
| <b>GSA29213_497</b>  | 548.9328209 | 882.665115  | 215.2005302 | 0.248807677  | -2.036184542 | 0.004023019  | 0.885367223 | <b>rlpF</b>  | ribosomal protein L6                                                       |
| <b>GSA29213_1379</b> | 227.2831988 | 382.2853035 | 72.28109412 | 0.189076309  | -2.402959489 | 0.002572069  | 0.836886972 | <b>NA</b>    | conserved hypothetical protein                                             |
